# Supplementary material for: Use of Capsid Integrity-qPCR for Detecting Viral Capsid Integrity in Wastewater
Source: MDPI journal article supplement (doi:10.3390/v16010040), 2023-12-26
Supplement: s1 [file s1]

**Table S1.** Primers, probes, and standard sequences used in this study.

| Target      | Postion                            | Ref | Primer sequence                                     | Dye/quencher | Target sequence                                                                                                                                            |
|-------------|------------------------------------|-----|-----------------------------------------------------|--------------|------------------------------------------------------------------------------------------------------------------------------------------------------------|
| Adenovirus  | 21418-21555                        | [1] | Forward:<br>5'-CATGACTTTTGAGGTGGATC-3'              | SYBR         | CATGACTTTTGAGGTG-<br>GATCCCATGGATGAGCCACCCCTGCTTTATCTT                                                                                                     |
|             |                                    |     | Reverse:<br>5'-CCGGCCGAGAASGGYGTGCG-<br>CAGGTA-3'   |              | CTTTTCGAAGTCTTCGACGTGGTCAGAGTG-<br>CACCAGCCACAC-<br>CGCGGGCGTCATCGAGGCCGTCTACCTGCGCAC<br>ACCGTTCTCGGCCCG                                                   |
| Enterovirus | 5'UTR                              | [2] | Forward:<br>5'-TGTCACCATAAGCAGYCN-3'                | HEX-BHQ1     | TTAATTGTCACCATAAGCAGCCAATACAA-<br>GAATAAAAAGAAACAC-<br>GGACACCCAAAGTAG-<br>TCGGTTCGCTGCAGAGTTGCCCGTTACGACA                                                 |
|             |                                    |     | Reverse:<br>5'-CCCTGAATGCGGCTAAT-3'                 |              | CACTGCCCTTTGGATTAAGGGTATGTGCTCCG-<br>CAGTTAGGATTAGCCGATTACAGGGGCCCGA                                                                                       |
| Hepatitis-A | 5'UTR                              | [3] | Probe:<br>5'-ACGGACACCCAAAGTAG-<br>TCGGTTC-3'       | HEX-BHQ1     | TACCTCACC GCCGTTTGCCTAGGC-<br>TATAGGCTAAATTTCCCTTTCCCTTTTCCCTTT                                                                                            |
|             |                                    |     | Forward:<br>5'-TCACCGCCGTTTGCTAG-3'                 |              | CCTATTCCCTTTGTTTGTCTGTAAATATTGAT-<br>TTGTAAATATTGATTCTG-<br>CAGGTTACAGGGTCTTAAATCTGTTTCTCTATA<br>AGAACACTCATTTAC-<br>GCTTTCTGTCTTCTTCTCCAGGGCTCTCCCT<br>TG |
| Influenza-A | Segment 7 matrix protein 2         | [4] | Forward: 5'-CAAGACCAAT-<br>CYTGTACCTCTGAC-3'        | FAM          | CTAAAGACAAGACCAATTCTGTAC-<br>CTCTGACTAAGGGGATTTTGGGGTTT-<br>GTGTTAC-<br>GCTCACCGTGCCAGTGAGCGAGGACTGCAG<br>CGTAGACGCTTTGTCCAAAA                             |
|             |                                    |     | Reverse: 5'-GCATTYTGACAAA-<br>VCGTCTACG-3'          |              |                                                                                                                                                            |
| Influenza-B | Segment 8 non-structural protein 1 | [4] | Forward: 5'-TCCTCAAYTCAC-<br>TCTTCGAGCG-3'          | YAK          | GGATCCTCAACTCACTCTTCGAGCGTTTT-<br>GATGAAGGACATTCAAAGCCAATTGAG-<br>CAGCTGAAACTGCGGTGGGAGTCTTATCCCAA<br>TTTGGTCAAGAGCACCGATT                                 |
|             |                                    |     | Reverse: 5'-<br>CGGTGCTCTTGACCAAATTGG-3'            |              |                                                                                                                                                            |
| Noro GI     | ORF1-RdRp                          | [3] | Probe: 5'-<br>CCAATTCTGA//GCAGCTGAAACTGC<br>GGTG-3' | FAM-MGB      | CGCTGGATGCGATTCCATGACTTAAGTTGTG-<br>GACAGGAGATCGCGATCTCTGCCCGAT-<br>TATGTAAATGATGATGGCGTCTAAGG                                                             |
|             |                                    |     | Forward: 5'-CGCTG-<br>GATGCGNTTCCAT-3'              |              |                                                                                                                                                            |
| Noro GII    | ORF1-RdRp                          | [3] | Reverse: 5'-<br>CCTTAGACGCCATCATTTTAC-3'            | DO-DDQII     | ATGTTTCAGATGGATGAGATTCTCAGATCTGAG-<br>CACGTGGGAGGGCGATCG-<br>CAATCTGGCTCCAGTTTGTGAATGAAGATG<br>GCGTCA                                                      |
|             |                                    |     | Probe: 5'-AGCACGTGG-<br>GAGGGCGATCG-3'              |              |                                                                                                                                                            |
| SARS-CoV-2  | N1                                 | [5] | Forward: 5'-<br>GACCCCAAATCAGCGAAAT-3'              | FAM-MGB      | GACCCCAAATCAGCGAAATGCACCCCG-<br>CATTACGTTTGGTGGACCCTCAGAT-<br>TCAACTGG-<br>CAGTAACCAGAATGGTGGGGCGCGATCAAAA<br>CAACGTCGGCCCCA                               |
|             |                                    |     | Reverse: 5'- TCTGGTACTGCCAGTT-<br>GAATCTG-3'        |              |                                                                                                                                                            |
|             |                                    |     | Probe: 5'-ACCCCG-<br>CATTACGTTTGGTGGACC-3'          |              |                                                                                                                                                            |

## References

1. Van Maarseveen, N.M.; Wessels, E.; De Brouwer, C.S.; Vossen, A.C.T.M.; Claas, E.C.J. Diagnosis of Viral Gastroenteritis by Simultaneous Detection of Adenovirus Group F, Astrovirus, Rotavirus Group A, Norovirus Genogroups I and II, and Sapovirus in Two Internally Controlled Multiplex Real-Time PCR Assays. *Journal of Clinical Virology* **2010**, *49*, 205–210, doi:10.1016/j.jcv.2010.07.019.

2. Gregory, J.B.; Litaker, R.W.; Noble, R.T. Rapid One-Step Quantitative Reverse Transcriptase PCR Assay with Competitive Internal Positive Control for Detection of Enteroviruses in Environmental Samples. *Appl Environ Microbiol* **2006**, *72*, 3960–3967, doi:10.1128/AEM.02291-05.
3. ISO 15216-2:2019 ISO 15216-2:2019 - Microbiology of the Food Chain — Horizontal Method for Determination of Hepatitis A Virus and Norovirus Using Real-Time RT-PCR — Part 2: Method for Detection Available online: <https://www.iso.org/standard/74263.html> (accessed on 6 November 2023).
4. Shu, B.; Kirby, M.K.; Davis, W.G.; Warnes, C.; Liddell, J.; Liu, J.; Wu, K.H.; Hassell, N.; Benitez, A.J.; Wilson, M.M.; et al. Multiplex Real-Time Reverse Transcription PCR for Influenza A Virus, Influenza B Virus, and Severe Acute Respiratory Syndrome Coronavirus 2 - Volume 27, Number 7—July 2021 - Emerging Infectious Diseases Journal - CDC. *Emerg Infect Dis* **2021**, *27*, 1821–1830, doi:10.3201/EID2707.210462.
5. Lu, X.; Wang, L.; Sakthivel, S.K.; Whitaker, B.; Murray, J.; Kamili, S.; Lynch, B.; Malapati, L.; Burke, S.A.; Harcourt, J.; et al. US CDC Real-Time Reverse Transcription PCR Panel for Detection of Severe Acute Respiratory Syndrome Coronavirus 2. *Emerg Infect Dis* **2020**, *26*, 1654, doi:10.3201/EID2608.201246.
